# Supplementary material
Source: PubMed Central journal article supplement (PMC1134981)

**Supplementary Figure 1 Fluorescent phosphosphingolipids synthesized by *S. cerevisiae* microsomal membranes**

(A) Membranes ( $100 \mu\text{g}\cdot\text{ml}^{-1}$ ) were incubated in  $100 \mu\text{l}$  of  $100 \text{ mM}$  Tris/HCl (pH 7.4) containing  $0.1 \text{ mM}$   $\text{C}_6\text{-NBD-cer}$ ,  $0.1\%$  TX-100 in the absence (-) or presence (+) of  $1 \text{ mM}$  PC, PE or PI. After 30 min of incubation at  $28^\circ\text{C}$ , lipids were extracted, separated by TLC and visualized using a PhosphorImager Storm 860. The relative positions of synthesized phosphosphingolipids labelled with  $\text{C}_6\text{-NBD-cer}$  and non-reacted  $\text{C}_6\text{-NBD-cer}$  are indicated on the left, together with the origin (Or) of the chromatogram. (B) Fluorescence intensities of synthesized phosphosphingolipids containing  $\text{C}_6\text{-NBD-cer}$  were quantified using ImageQuant5.2.

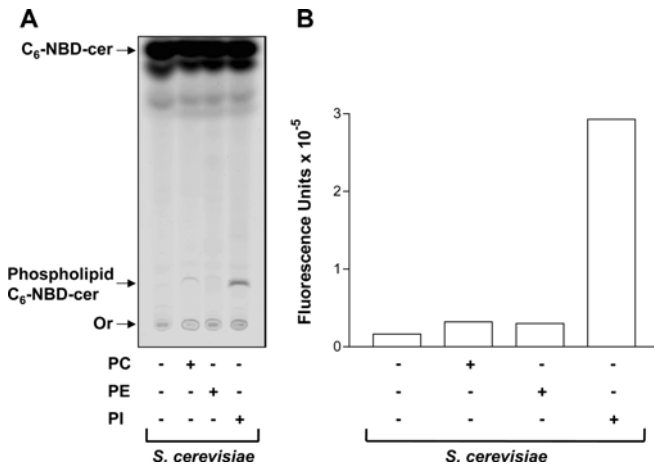

**Supplementary Figure 2 *T. cruzi* IPC synthase is not inhibited by rustmicin, aureobasidin or verapamil either alone or in combination**

(A) Epimastigotes microsomal membranes ( $100 \mu\text{g}\cdot\text{ml}^{-1}$ ) were preincubated for 10 min under standard conditions for *T. cruzi* IPC synthase activity in the absence (-) or presence (+) of  $10 \mu\text{g}\cdot\text{ml}^{-1}$  rustmicin, aureobasidin A or verapamil as indicated before the addition of  $\text{C}_6\text{-NBD-cer}$ . After 30 min of incubation at  $28^\circ\text{C}$ , lipids were extracted, separated by TLC and visualized using a PhosphorImager Storm 860. The relative positions of synthesized IP- $\text{C}_6\text{-NBD-cer}$  and unchanged  $\text{C}_6\text{-NBD-cer}$  are indicated on the left, together with the origin (Or) and the front (Fr) of the chromatogram. (B) Fluorescence intensities of synthesized IP- $\text{C}_6\text{-NBD-cer}$  were quantified using ImageQuant5.2.

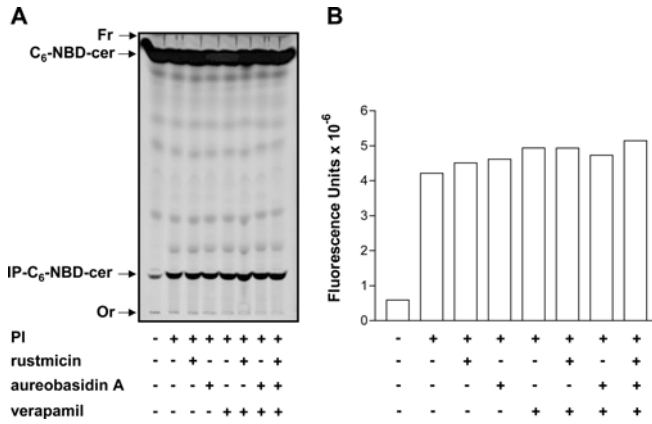

**Supplementary Figure 3 Effects of verapamil, aureobasidin A or both on the phagocytic capacity of non-infected M $\phi$**

Murine peritoneal M $\phi$ , plated on to coverslips, were infected with TCT forms of *T. cruzi* (ratio of 10 zimosan particles per M $\phi$ ) for 1 h, washed and incubated with fresh medium alone (control) or a medium containing 1  $\mu\text{g}\cdot\text{ml}^{-1}$  verapamil (ver), 25  $\mu\text{g}\cdot\text{ml}^{-1}$  aureobasidin A (aurA) or both (ver+aurA) as indicated. After 3 days, the coverslips were fixed, stained with Giemsa, and the percentage of M $\phi$  containing yeast particles as well as the number of particles per M $\phi$  were determined by direct counting and used to calculate the phagocytic index for each condition. Results are the means $\pm$ S.D. for two independent experiments (performed in quadruplicate).

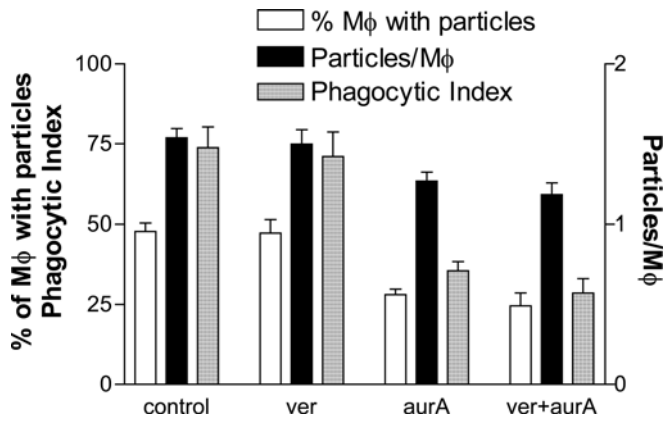

Supplement: bj3870519add.pdf [file bj3870519add.pdf]
